# Supplementary material for: Tuning Microstructure and Mechanical Performance of a Co-Rich Transformation-Induced Plasticity High Entropy Alloy
Source: MDPI journal article supplement (doi:10.3390/ma15134611), 2022-06-30
Supplement: s1 [file s1]

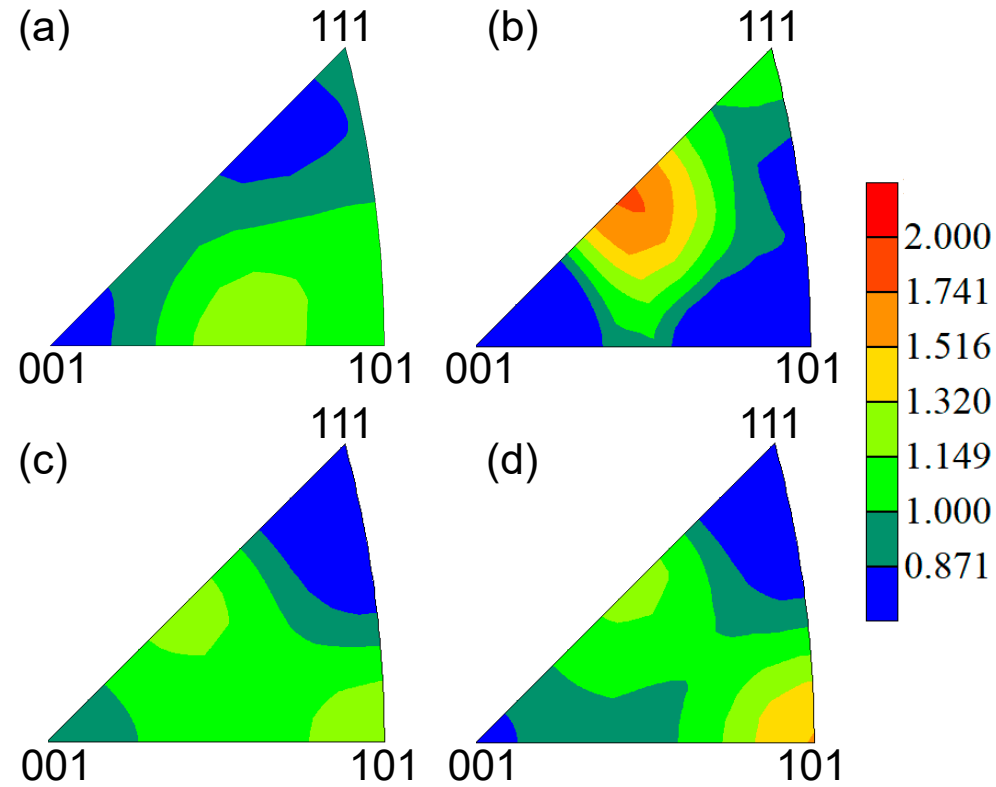

**Figure S1.** EBSD inverse pole figures show the grain texture of the (a) as-solutionized (AS), (b) hot-rolled (HR), (c) cold-rolled and heat-treated at 973 K for 30 min (HT1), (d) cold-rolled and heat-treated at 1023 K for 30 min (HT2) of the  $\text{Co}_{35}\text{Cr}_{25}\text{Mn}_{15}\text{Ni}_{15}\text{Fe}_{10}$  HEA, which is corresponding to the images shown in Figure 1.

**Table S1.** Vickers hardness of the as-solutionized (AS), warm-rolled (WR), cold-rolled and heat-treated at 973 K for 30 min (HT1), cold-rolled and heat-treated at 1023 K for 30 min (HT2) of the  $\text{Co}_{35}\text{Cr}_{25}\text{Mn}_{15}\text{Ni}_{15}\text{Fe}_{10}$  HEA.

| Sample   | AS          | WR        | HT1       | HT2       |
|----------|-------------|-----------|-----------|-----------|
| Hardness | 233.56±11.5 | 363.6±1.5 | 277.3±5.3 | 251.2±3.7 |
